# Supplementary material for: Association between Respiratory Diseases and the Incidence Risk of Colorectal Cancer among US Adults: A Cross-sectional Analysis Based on the National Health and Nutrition Examination Survey (NHANES) from 2007 to 2010
Source: Research Square preprint supplement (doi:10.21203/rs.3.rs-6621594/v1), 2025-07-02
Supplement: Supplementary file 1 [file 18a3acf0e6cf48fd4552bf32.docx]

**Table 2** Baseline characteristics

|  | level | Overall | No | Yes | p | test |
| --- | --- | --- | --- | --- | --- | --- |
| n |  | 529 | 495 | 34 |  |  |
| Race (%) | Mexican American | 38 ( 7.2) | 36 ( 7.3) | 2 ( 5.9) | 0.822 |  |
|  | Other Hispanic | 28 ( 5.3) | 27 ( 5.5) | 1 ( 2.9) |  |  |
|  | Non-Hispanic White | 382 (72.2) | 357 (72.1) | 25 (73.5) |  |  |
|  | Non-Hispanic Black | 72 (13.6) | 66 (13.3) | 6 (17.6) |  |  |
|  | Other Race | 9 ( 1.7) | 9 ( 1.8) | 0 ( 0.0) |  |  |
| Gender (%) | Male | 271 (51.2) | 250 (50.5) | 21 (61.8) | 0.274 |  |
|  | Female | 258 (48.8) | 245 (49.5) | 13 (38.2) |  |  |
| Age (median [IQR]) |  | 65.00 [54.00, 74.00] | 64.00 [53.00, 73.00] | 73.00 [63.00, 76.75] | 0.006 | nonnorm |
| EDUcation (median [IQR]) |  | 4.00 [3.00, 5.00] | 4.00 [3.00, 5.00] | 3.00 [2.00, 4.00] | 0.007 | nonnorm |
| Marage (%) | Married | 366 (69.2) | 344 (69.5) | 22 (64.7) | 0.694 |  |
|  | Widowed | 163 (30.8) | 151 (30.5) | 12 (35.3) |  |  |
| PIR (median [IQR]) |  | 2.75 [1.37, 5.00] | 2.87 [1.39, 5.00] | 2.35 [1.08, 3.95] | 0.096 | nonnorm |
| BMI (median [IQR]) |  | 28.21 [24.46, 32.21] | 28.20 [24.23, 32.21] | 28.66 [24.93, 32.89] | 0.577 | nonnorm |
| Smoke (%) | Yes | 322 (60.9) | 301 (60.8) | 21 (61.8) | 1 |  |
|  | No | 207 (39.1) | 194 (39.2) | 13 (38.2) |  |  |
| Drink (%) | Yes | 95 (18.0) | 82 (16.6) | 13 (38.2) | 0.003 |  |
|  | No | 434 (82.0) | 413 (83.4) | 21 (61.8) |  |  |
| Hypertension (%) | Yes | 295 (55.8) | 274 (55.4) | 21 (61.8) | 0.583 |  |
|  | No | 234 (44.2) | 221 (44.6) | 13 (38.2) |  |  |
| C_protein (median [IQR]) |  | 0.20 [0.09, 0.46] | 0.21 [0.09, 0.45] | 0.20 [0.09, 0.85] | 0.655 | nonnorm |
| VD (median [IQR]) |  | 0.00 [0.00, 0.10] | 0.00 [0.00, 0.10] | 0.00 [0.00, 0.20] | 0.209 | nonnorm |
| VK (median [IQR]) |  | 0.50 [0.00, 2.50] | 0.50 [0.00, 2.60] | 0.15 [0.00, 1.35] | 0.093 | nonnorm |
| W_protein (median [IQR]) |  | 4.20 [4.00, 4.40] | 4.20 [4.00, 4.40] | 4.15 [4.00, 4.40] | 0.554 | nonnorm |
| breath (%) | No | 450 (85.6) | 431 (87.6) | 19 (55.9) | <0.001 |  |
|  | Yes | 76 (14.4) | 61 (12.4) | 15 (44.1) |  |  |
